# Supplementary material for: Revealing the Changes in Saliva and Serum Proteins of Pigs with Meningitis Caused by Streptococcus Suis: A Proteomic Approach
Source: MDPI journal article supplement (doi:10.3390/ijms232213700), 2022-11-08
Supplement: s1 [file s1]

## Supplementary data

**Supplementary Table S1.** Proteins with different relative abundances in the saliva of the piglets with meningitis (MP) and healthy piglets (HP).

| Accession ID                           | Gene         | Description                                                | FC   | Log2FC | P-value | FDR   |
|----------------------------------------|--------------|------------------------------------------------------------|------|--------|---------|-------|
| <i>Higher relative abundance in MP</i> |              |                                                            |      |        |         |       |
| A0A4X1SRF3                             | VCL          | Metavinculin                                               | 1.62 | 0.70   | 0.002   | 0.017 |
| A0A287A191                             | DSC2         | Desmocollin 2                                              | 1.58 | 0.66   | 0.004   | 0.023 |
| A0A287ALC1                             | IGHM         | Immunoglobulin heavy constant mu                           | 1.57 | 0.65   | 0.003   | 0.018 |
| A0A4X1U0N5                             | ALDOA        | Fructose-bisphosphate aldolase                             | 1.56 | 0.64   | 0.002   | 0.017 |
| A0A4X1TUX8                             | SERPINB12    | SERPIN domain-containing protein                           | 1.53 | 0.61   | 0.003   | 0.018 |
| A0A4X1SFT0                             | ECM1*        | Extracellular matrix protein 1*                            | 1.50 | 0.58   | 0.007   | 0.033 |
| A0A4X1VL50                             | DSG3*        | Desmoglein 3*                                              | 1.45 | 0.54   | 0.008   | 0.035 |
| A0A4X1TTU1                             | ADA*         | Adenosine aminohydrolase*                                  | 1.39 | 0.48   | 0.011   | 0.045 |
| A0A287A6P1                             | GSN          | Actin-depolymerizing factor                                | 1.38 | 0.46   | 0.002   | 0.017 |
| F1RFV3                                 | VMO1         | Vitelline membrane outer layer protein 1                   | 1.30 | 0.38   | 0.006   | 0.030 |
| Q4A3R3-2                               | DMBT1        | Isoform 2 of Deleted in malignant brain tumors 1 protein   | 1.22 | 0.29   | 0.011   | 0.045 |
| <i>Lower abundance in MP</i>           |              |                                                            |      |        |         |       |
| A0A5G2R5N9                             | TF           | Serotransferrin                                            | 0.86 | -0.22  | 0.002   | 0.017 |
| F1SGG3                                 | KRT1         | Cytokeratin-1                                              | 0.80 | -0.32  | 0.001   | 0.013 |
| P81245                                 | OBP*         | Odorant-binding protein*                                   | 0.79 | -0.34  | 0.011   | 0.045 |
| A0A5G2QYD6                             | HRG          | Cystatin domain-containing protein                         | 0.72 | -0.47  | 0.002   | 0.017 |
| A0A4X1TA63                             | CHIA         | Chitinase                                                  | 0.69 | -0.54  | 0.001   | 0.013 |
| K7GM40                                 | APOA1        | Apolipoprotein A-I                                         | 0.68 | -0.56  | 0.001   | 0.013 |
| A0A4X1W8Z7                             | A1BG*        | Alpha-1B-glycoprotein*                                     | 0.63 | -0.67  | 0.006   | 0.030 |
| A0A287B057                             | OBP2B        | Lipocln_cytosolic_FA-bd_dom domain-containing protein      | 0.59 | -0.76  | < 0.001 | 0.013 |
| P02067                                 | HBB          | Hemoglobin subunit beta                                    | 0.55 | -0.86  | 0.001   | 0.013 |
| A0A4X1T2P9                             | LOC100739218 | Double-headed protease inhibitor, submandibular gland-like | 0.33 | -1.60  | < 0.001 | 0.013 |

FC – fold change, calculated as median (Group MP)/median (Group HP); FDR– false discovery rate; \* after blasting in UniProt



|                                                                                                                             |              |                                                            |      |       |         |         |
|-----------------------------------------------------------------------------------------------------------------------------|--------------|------------------------------------------------------------|------|-------|---------|---------|
| A0A286ZYZ<br>5                                                                                                              | LOC106504547 | SERPIN domain-containing protein                           | 2.03 | 1.02  | < 0.001 | 0.005   |
| Q8SPS7                                                                                                                      | HP           | Haptoglobin                                                | 1.81 | 0.85  | < 0.001 | < 0.001 |
| O19063                                                                                                                      | APCS         | Serum amyloid P-component                                  | 1.70 | 0.77  | < 0.001 | < 0.001 |
| A0A4X1SH9<br>2                                                                                                              | LOC396684*   | SERPIN domain-containing protein                           | 1.50 | 0.58  | < 0.001 | < 0.001 |
| A0A4X1TJP8                                                                                                                  | LBP          | Lipopolysaccharide-binding protein                         | 1.45 | 0.54  | 0.002   | 0.015   |
| F1SCC6                                                                                                                      | LOC100156325 | SERPIN domain-containing protein                           | 1.43 | 0.52  | < 0.001 | < 0.001 |
| A0A4X1T8C9                                                                                                                  | CPN2*        | Carboxypeptidase N subunit 2                               | 1.23 | 0.30  | 0.010   | 0.047   |
| <i>Lower abundance in MP</i>                                                                                                |              |                                                            |      |       |         |         |
| K7GPT9                                                                                                                      | CFB          | C3/C5 convertase                                           | 0.92 | -0.12 | 0.009   | 0.046   |
| A2THZ2                                                                                                                      | ALB*         | Albumin (Fragment)                                         | 0.86 | -0.22 | 0.005   | 0.034   |
| A0A480KXE<br>8                                                                                                              | MGAM*        | Maltase-glucoamylase, intestinal                           | 0.80 | -0.33 | 0.002   | 0.015   |
| A0A480QPG<br>5                                                                                                              | HGFAC*       | Hepatocyte growth factor activator isoform 2 preproprotein | 0.80 | -0.31 | 0.001   | 0.012   |
| A0A5S8KLN<br>1                                                                                                              | CLU          | Clusterin                                                  | 0.78 | -0.36 | 0.007   | 0.040   |
| A0A480SQD<br>8                                                                                                              | ITIH1*       | Inter-alpha-trypsin inhibitor heavy chain H1 isoform       | 0.77 | -0.39 | < 0.001 | < 0.001 |
| A0A480RB65                                                                                                                  | TF*          | Serotransferrin                                            | 0.77 | -0.37 | 0.001   | 0.009   |
| A0A4X1W71<br>8                                                                                                              | AponN*       | Beta-1 metal-binding globulin                              | 0.77 | -0.38 | 0.001   | 0.009   |
| A0A4X1W7I<br>8                                                                                                              | ApoN*        | Ovarian and testicular apolipoprotein N                    | 0.75 | -0.42 | 0.009   | 0.047   |
| P48819                                                                                                                      | VTN          | Vitronectin                                                | 0.74 | -0.44 | < 0.001 | 0.005   |
| A0A5G2QEV<br>5                                                                                                              | ITIH2        | Inter-alpha-trypsin inhibitor heavy chain H2               | 0.74 | -0.43 | < 0.001 | 0.005   |
| K7GM40                                                                                                                      | APOA1        | Apolipoprotein A-I                                         | 0.68 | -0.57 | 0.007   | 0.040   |
| A0A481B9A6                                                                                                                  | HRG*         | Histidine-rich glycoprotein                                | 0.58 | -0.78 | < 0.001 | 0.003   |
| FC – fold change, calculated as median (Group MP)/median (Group HP); FDR– false discovery rate; * after blasting in UniProt |              |                                                            |      |       |         |         |

**Supplementary Table S4.** Gene Ontology for the serum proteins with the different abundance between piglets with meningitis and healthy piglets.

| Ontology           | Description                                                                            | Genes           |            |
|--------------------|----------------------------------------------------------------------------------------|-----------------|------------|
|                    |                                                                                        | Number of genes | % of genes |
| Molecular Function | binding (GO:0005488)                                                                   | 8               | 27.6       |
|                    | molecular function regulator (GO:0098772)                                              | 4               | 13.8       |
|                    | catalytic activity (GO:0003824)                                                        | 8               | 27.6       |
| Biological Process | cellular process (GO:0009987)                                                          | 9               | 31.0       |
|                    | localization (GO:0051179)                                                              | 6               | 20.7       |
|                    | biological process involved in interspecies interaction between organisms (GO:0044419) | 5               | 17.2       |
|                    | biological regulation (GO:0065007)                                                     | 8               | 27.6       |
|                    | response to stimulus (GO:0050896)                                                      | 9               | 31.0       |
|                    | signaling (GO:0023052)                                                                 | 1               | 3.4        |
|                    | developmental process (GO:0032502)                                                     | 2               | 6.9        |
|                    | multicellular organismal process (GO:0032501)                                          | 2               | 6.9        |

|                       |                                                 |    |       |
|-----------------------|-------------------------------------------------|----|-------|
|                       | biological adhesion (GO:0022610)                | 2  | 6.9   |
|                       | metabolic process (GO:0008152)                  | 6  | 20.7  |
|                       | growth (GO:0040007)                             | 2  | 6.9   |
|                       | immune system process (GO:0002376)              | 5  | 17.2  |
| Cellular<br>Component | cell periphery (GO:0071944)                     | 7  | 38.9  |
|                       | membrane (GO:0016020)                           | 4  | 22.2  |
|                       | cytoplasm (GO:0005737)                          | 6  | 33.3  |
|                       | external encapsulating structure (GO:0030312)   | 3  | 16.7  |
|                       | extracellular region (GO:0005576)               | 18 | 100.0 |
|                       | intracellular anatomical structure (GO:0005622) | 6  | 33.3  |
|                       | endomembrane system (GO:0012505)                | 4  | 22.2  |
|                       | organelle (GO:0043226)                          | 4  | 22.2  |
|                       | extracellular space (GO:0005615)                | 18 | 100.0 |
| Protein<br>Class      | transmembrane signal receptor (PC00197)         | 1  | 3.4   |
|                       | transfer/carrier protein (PC00219)              | 8  | 27.6  |
|                       | defense/immunity protein (PC00090)              | 1  | 3.4   |
|                       | protein-binding activity modulator (PC00095)    | 8  | 27.6  |
|                       | metabolite interconversion enzyme (PC00262)     | 1  | 3.4   |
|                       | protein modifying enzyme (PC00260)              | 3  | 10.3  |
